# Supplementary material for: Excess of Deleterious Mutations around HLA Genes Reveals Evolutionary Cost of Balancing Selection
Source: PubMed Central journal article supplement — Mol Biol Evol. 2016 Jun 28;33(10):2555–64. doi: 10.1093/molbev/msw127 (PMC5026253; doi:10.1093/molbev/msw127), 2016-06-28
Supplement: supp_msw127_HLA-load_SupplementaryMaterial.pdf [file supp_msw127_HLA-load_SupplementaryMaterial.pdf]

**Excess of Deleterious Mutations around HLA Genes Reveals Evolutionary Cost of  
Balancing Selection**

**Tobias L. Lenz<sup>1,2</sup>, Victor Spirin<sup>1</sup>, Daniel M. Jordan<sup>1</sup> & Shamil R. Sunyaev<sup>1,3</sup>**

<sup>1</sup> Division of Genetics, Department of Medicine, Brigham and Women's Hospital, Harvard Medical School, Boston, MA 02115, USA

<sup>2</sup> Evolutionary Immunogenomics, Department of Evolutionary Ecology, Max Planck Institute for Evolutionary Biology, 24306 Plön, Germany

<sup>3</sup> Program in Medical and Population Genetics, The Broad Institute, Cambridge, MA 02142, USA

| <b>Content:</b>                   | <b>Page</b> |
|-----------------------------------|-------------|
| <b>Supplementary Note S1</b>      | <b>2</b>    |
| <b>Supplementary Tables S1-2</b>  | <b>3</b>    |
| <b>Supplementary Figures S1-6</b> | <b>5</b>    |

**Supplementary Notes****Supplementary Note S1: Distribution of derived allele frequencies within subpopulations**

The ESP6500 release contains data from two human subpopulation, African Americans (AAs) and European Americans (EAs). The trend for elevated allele frequencies of deleterious variants in genes of the MHC regions holds also within subpopulation of the ESP data set. For African Americans (N = 2,203), the shift in the site frequency spectrum (SFS) of probably damaging variants is statistically significant (Wilcoxon rank-sum test,  $P < 0.001$ ; **Fig. S4a**). In loss-of-function (LOF) variants, the frequency shift is not significant (Wilcoxon rank-sum test,  $P = 0.52$ ), but follows the same trend (**Fig. S4b**): Across a range of frequency thresholds, the fraction of LOF alleles with that or higher frequency is consistently larger in the MHC region (**Tab. S1**). For European Americans (N = 4,300), the SFS shift in both probably damaging and LOF variants is statistically significant (Wilcoxon rank-sum test, both  $P < 0.01$ ; **Fig. S4c/d**).

**Supplementary Tables****Supplementary Table S1: Distribution of loss-of-function variants in African Americans**

Fraction and number of loss-of-function (LOF) variants above different lower frequency thresholds in the African American subpopulation of the ESP6500 data.

| Lower frequency thresholds | Complete exome |               | MHC region only<br>(without classical HLA loci) |               |
|----------------------------|----------------|---------------|-------------------------------------------------|---------------|
|                            | Fraction [%]   | #LOF variants | Fraction [%]                                    | #LOF variants |
| 0.01                       | 1.9            | 296           | 2.8                                             | 2             |
| 0.005                      | 2.7            | 418           | 2.8                                             | 2             |
| 0.001                      | 6.6            | 1018          | 8.3                                             | 6             |
| 0.0005                     | 10.0           | 1546          | 18.1                                            | 13            |

### Supplementary Table S2: Genes in the MHC region carrying potentially deleterious variants with elevated frequencies

Listed are the 25 genes in the MHC region with the highest average derived allele frequency (DAF) of potentially deleterious variants in the ESP6500 data, including the number and frequency of probably damaging (based on PolyPhen-2 prediction) and loss-of-function variants. Also listed for each gene are relevant diseases reported in NHGRI GWAS Catalog and NIH Genetic Association Database. Note that the information from these databases does not always represent independent and/or causal effects. For some genes only a subset of reported diseases is listed. Gene position on chromosome 6 is based on GRCh37. Genes are sorted according to average DAF of probably damaging variants.

| Gene     | Position (first SNP) | Probably damaging variants |             | Loss-of-function variants |             | Diseases (NIH Genetic Association Database)                                                         | Diseases (NHGRI GWAS catalog)                                                                                                |
|----------|----------------------|----------------------------|-------------|---------------------------|-------------|-----------------------------------------------------------------------------------------------------|------------------------------------------------------------------------------------------------------------------------------|
|          |                      | # SNPs                     | av. DAF [%] | # SNPs                    | av. DAF [%] |                                                                                                     |                                                                                                                              |
| PPT2     | chr6:32121361        | 5                          | 17.973      | 0                         | 0.000       | Pulmonary function, type 1 diabetes                                                                 | Prostate cancer, pulmonary function                                                                                          |
| MICA     | chr6:31371397        | 6                          | 9.715       | 0                         | 0.000       | Behcet's disease, type 1 diabetes                                                                   | Hepatocellular carcinoma, HIV-1 control, rheumatoid arthritis, Behcet's disease                                              |
| PSORS1C1 | chr6:31097369        | 2                          | 8.815       | 1                         | 0.012       | Multiple sclerosis, psoriasis                                                                       | Toxic epidermal necrolysis, systemic sclerosis, Crohn's disease                                                              |
| MCCD1    | chr6:31496751        | 3                          | 5.415       | 0                         | 0.000       | AIDS progression, multiple sclerosis                                                                | AIDS progression                                                                                                             |
| LY6G5B   | chr6:31638728        | 6                          | 2.878       | 0                         | 0.000       | unknown                                                                                             | none                                                                                                                         |
| GPANK1   | chr6:31629995        | 7                          | 2.805       | 0                         | 0.000       | unknown                                                                                             | none                                                                                                                         |
| DPCR1    | chr6:30908806        | 14                         | 2.158       | 1                         | 0.008       | Systemic lupus                                                                                      | HIV-1 control                                                                                                                |
| CFB      | chr6:31914024        | 9                          | 1.992       | 2                         | 0.010       | Macular degeneration, systemic lupus                                                                | Age-related macular degeneration, prostate cancer                                                                            |
| RNF39    | chr6:30038875        | 3                          | 1.503       | 1                         | 0.008       | AIDS progression, systemic lupus, multiple sclerosis                                                | AIDS progression                                                                                                             |
| PRRC2A   | chr6:31590542        | 56                         | 1.387       | 0                         | 0.000       | unknown                                                                                             | Schizophrenia                                                                                                                |
| C6orf15  | chr6:31079111        | 11                         | 1.180       | 0                         | 0.000       | Leprosy, systemic lupus                                                                             | Follicular lymphoma, Graves' disease                                                                                         |
| C6orf10  | chr6:32260736        | 4                          | 1.167       | 3                         | 0.020       | Multiple sclerosis, type I diabetes, diabetic nephropathies, Rheumatoid arthritis, Asthma           | Asthma, multiple sclerosis, rheumatoid arthritis                                                                             |
| CCHCR1   | chr6:31110338        | 31                         | 0.990       | 0                         | 0.000       | Psoriasis, ulcerative colitis, prostate cancer                                                      | Prostate cancer, multiple myeloma                                                                                            |
| VARS2    | chr6:30882634        | 25                         | 0.833       | 3                         | 0.009       | Leprosy, HIV-1 control                                                                              | Ulcerative colitis, HIV-1 control                                                                                            |
| KIAA1949 | chr6:30645012        | 11                         | 0.787       | 2                         | 0.020       | unknown                                                                                             | none                                                                                                                         |
| TRIM15   | chr6:30131468        | 6                          | 0.775       | 1                         | 0.122       | Multiple sclerosis, Psoriasis                                                                       | none                                                                                                                         |
| MDC1     | chr6:30668226        | 39                         | 0.767       | 1                         | 0.008       | unclear                                                                                             | Primary biliary cirrhosis                                                                                                    |
| ZFP57    | chr6:29640247        | 5                          | 0.668       | 1                         | 0.013       | Nasopharyngeal carcinoma                                                                            | none                                                                                                                         |
| NEU1     | chr6:31827505        | 4                          | 0.659       | 0                         | 0.000       | unknown                                                                                             | none                                                                                                                         |
| TRIM31   | chr6:30071279        | 5                          | 0.640       | 1                         | 0.356       | Cardiomegaly, psoriasis                                                                             | None                                                                                                                         |
| TNXB     | chr6:32010144        | 95                         | 0.614       | 0                         | 0.000       | Macular degeneration, type 1 diabetes, systemic lupus, multiple sclerosis                           | Age-related macular degeneration, HIV-1 control, systemic lupus, prostate cancer                                             |
| BTNL2    | chr6:32362521        | 19                         | 0.544       | 1                         | 0.640       | Leprosy, systemic lupus, multiple sclerosis, type 1 diabetes, ulcerative colitis, biliary cirrhosis | Asthma, lung adenocarcinoma, sarcoidosis, ulcerative colitis, multiple sclerosis, dementia, Crohn's disease, prostate cancer |
| C2       | chr6:31868837        | 5                          | 0.536       | 0                         | 0.000       | Macular degeneration, systemic lupus, C2-deficiency, hepatocellular carcinoma                       | Age-related macular degeneration, prostate cancer, schizophrenia, Crohn's disease, ulcerative colitis, systemic lupus        |
| C6orf26  | chr6:31730793        | 5                          | 0.486       | 1                         | 0.095       |                                                                                                     | None                                                                                                                         |
| TAP1     | chr6:32813421        | 22                         | 0.485       | 4                         | 0.014       | Grave's disease, psoriasis, asthma, cervical cancer, cystic fibrosis, primary glaucoma              | Breast cancer, nephropathy, Alzheimer's disease                                                                              |

## Supplementary Figures

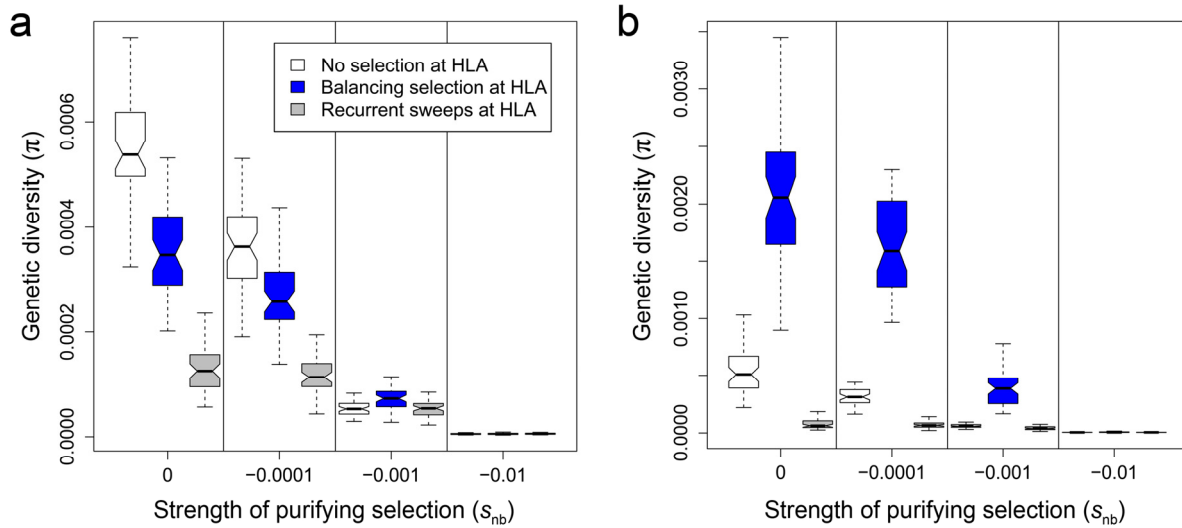

### Supplementary Figure S1: Effect of different levels of recombination on simulated nucleotide diversity around the HLA

Nucleotide diversity along the regions surrounding the HLA gene are shown for simulations with (a) high ( $r = 4.4e-8$ ) and (b) low ( $r = 4.4e-10$ ) rates of recombination, in contrast to the original empirical level used in the main simulations ( $r = 4.4e-9$ ). Same representation of HLA selection scenarios as in **figure 2c** in the main manuscript. Each simulation was replicated 50 times. Note the different y-axis scales.

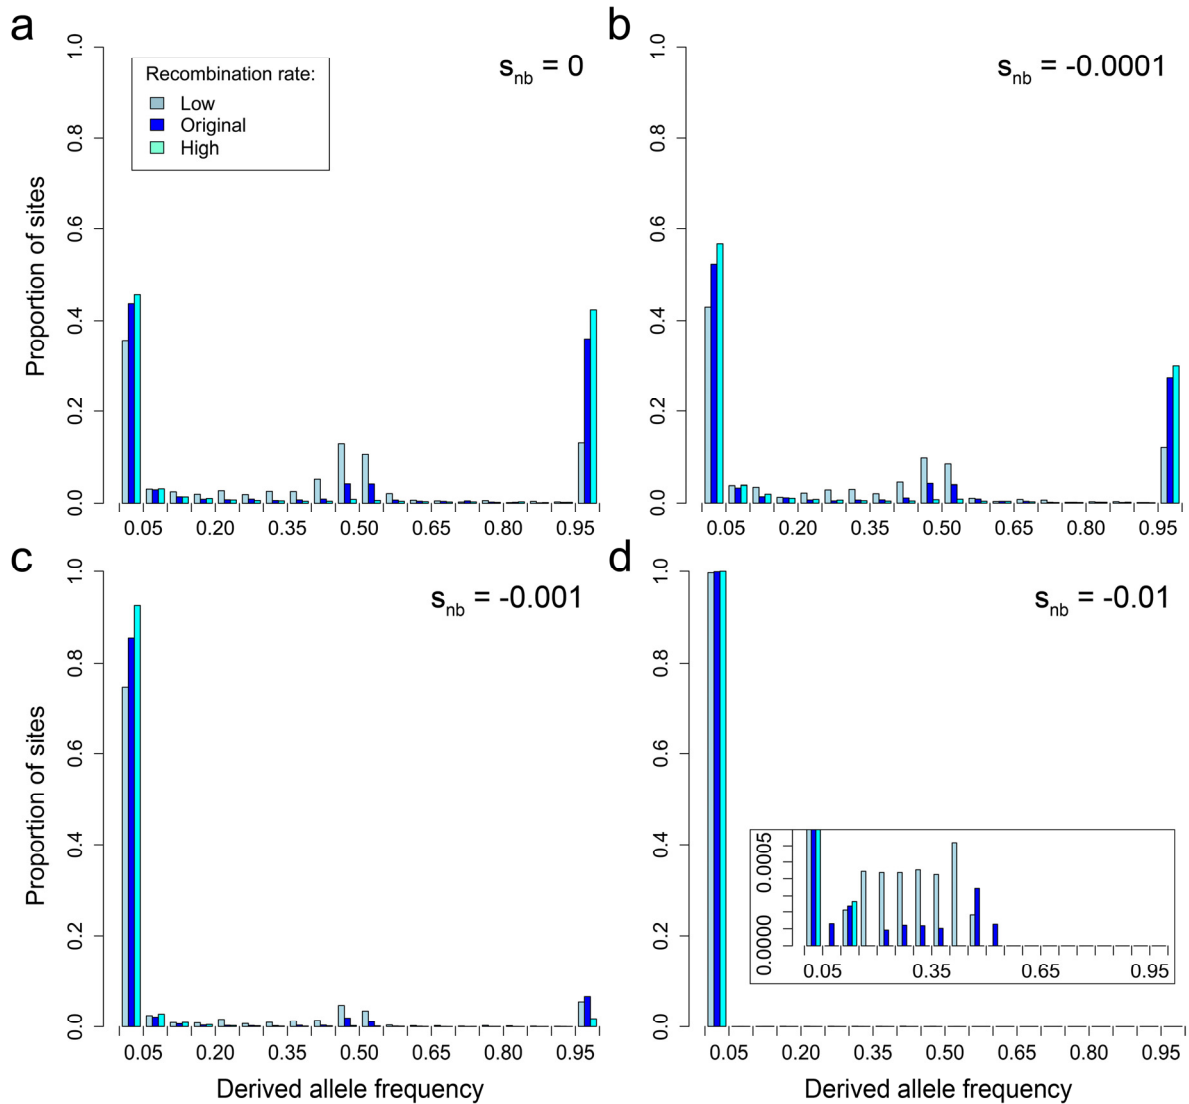

### Supplementary Figure S2: Simulated site frequency spectrum of variants surrounding the HLA gene under balancing selection with different levels of recombination

Derived allele frequencies along the regions around the HLA gene are derived from simulations with three different levels of recombination (light blue: low recombination rate [ $r = 4.4e-10$ ], dark blue: original [ $r = 4.4e-9$ ], cyan: high [ $r = 4.4e-8$ ]). Here the HLA gene evolved under balancing selection in all scenarios, while the variants in neighboring regions evolved (a) neutrally ( $s_{nb} = 0$ ) or under co-dominant purifying selection with (b)  $s_{nb} = -0.0001$ , (c)  $s_{nb} = -0.001$ , or (d)  $s_{nb} = -0.01$ , respectively. Note the different y-axis scale in the zoomed inset of panel (d) for better visualization. Each simulation was replicated 50 times.

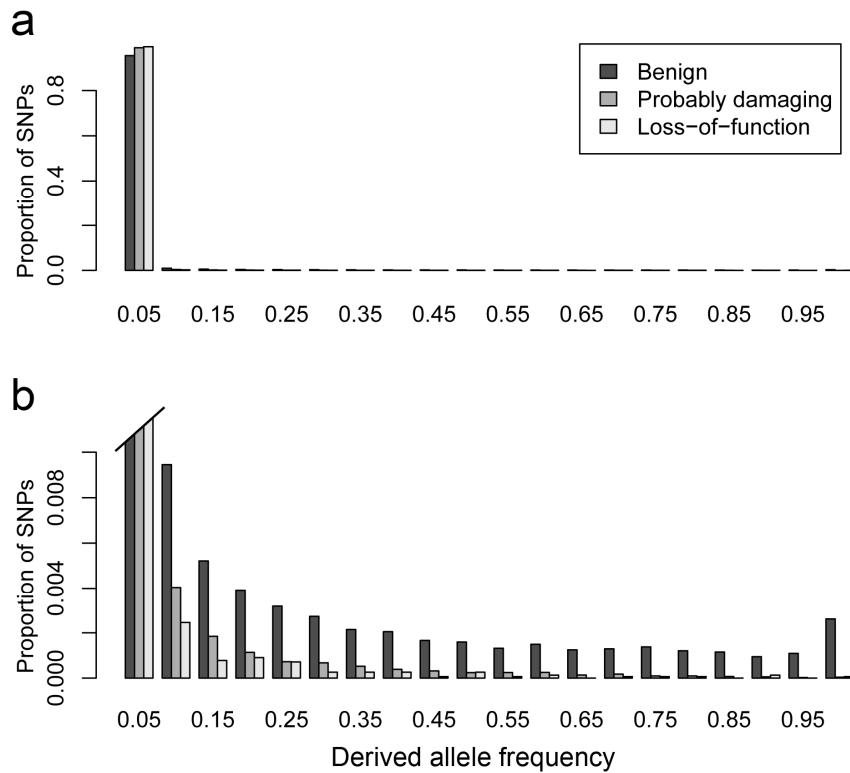

**Supplementary Figure S3: Site frequency spectra of different missense variant categories across the entire exome**

Distribution of exome-wide derived allele frequencies for missense variants predicted to be “benign” or “probably damaging” by PolyPhen-2, as well as for loss-of-function (stop-gain) variants. Allele frequency data from the ESP6500 exome sequencing dataset, shown (a) at full scale and (b) zoomed in to visualize rare variant classes.

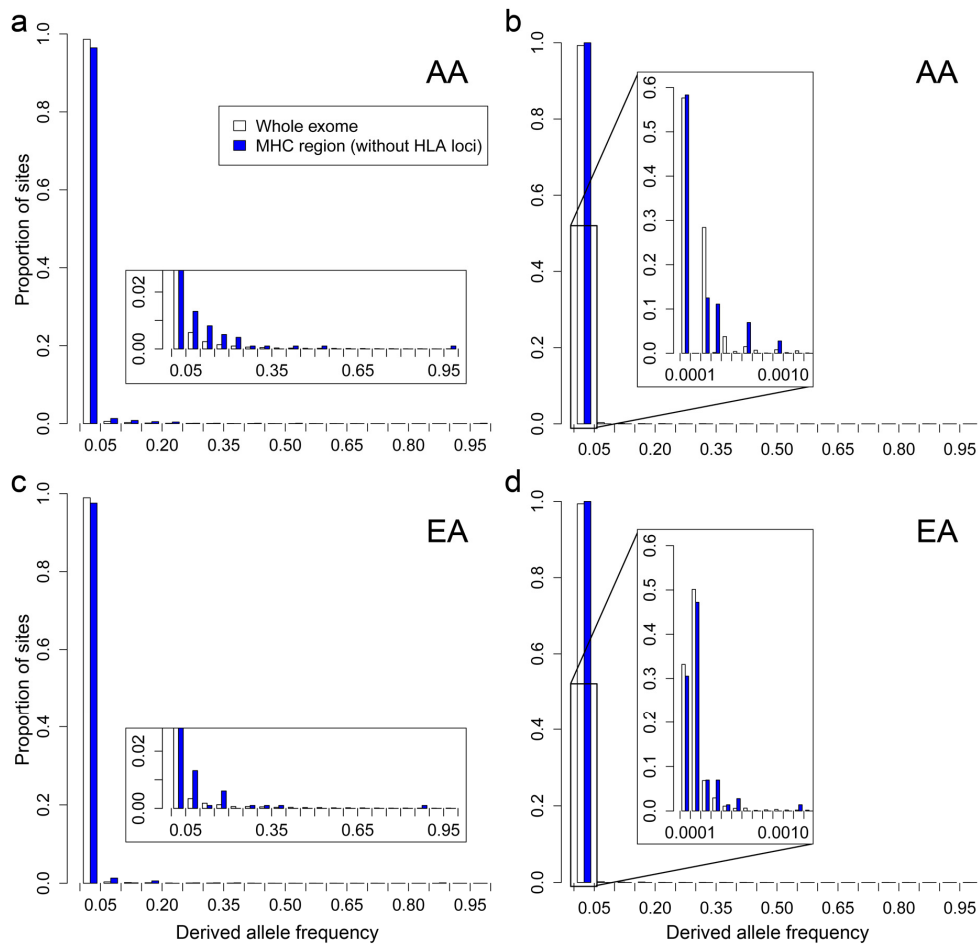

**Supplementary Figure S4: Site frequency spectra (SFS) within subpopulations of the ESP6500 dataset**

Distribution of derived allele frequencies within subpopulations are shown for potentially deleterious variants ('probably damaging' and loss-of-function) in African Americans (AA, a) and b) respectively) and in European Americans (EA; c) and d) respectively). Note the different x- and y-axis scales in the four insets.



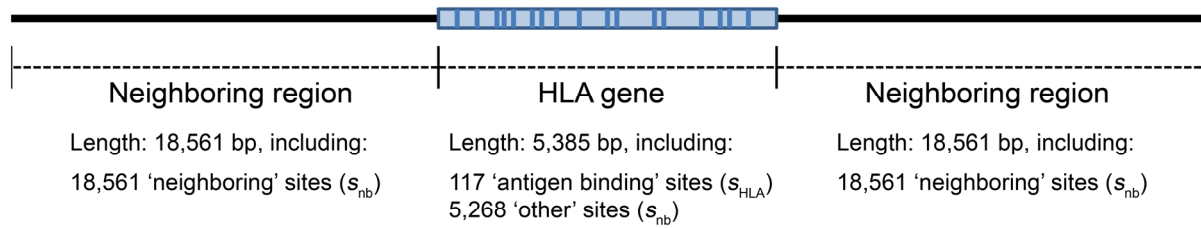

### Supplementary Figure S5: Schematic of the simulated HLA region

Shown is the model of the simulated HLA region as described in the methods. The total length of the simulated genome is 42,507 bp. The virtual HLA gene in the middle contains 117 sites that are evolving under the specified HLA selection scenario and are specified at the beginning of each simulation run (after burnin). It furthermore contains 5,268 sites that evolve under the same selection as the neighboring regions, but which are excluded from analyses, as we are only interested in genetic variation neighboring the HLA gene. The neighboring regions each contain 18,561 sites that evolve under different levels of purifying selection. For reasoning of the lengths of the different regions and a description of the different selection regimes see the original methods section.

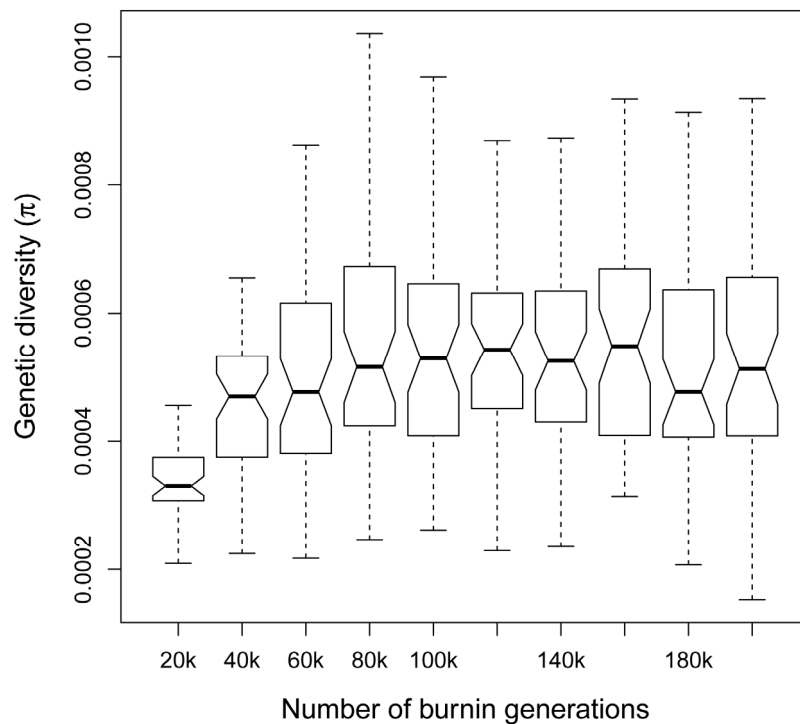

**Supplementary Figure S6: Simulated neutral genetic diversity after different burnin periods**

Shown is the level of neutral genetic diversity achieved after different periods of burnin (20,000 – 200,000 generations,  $N = 10,000$ ). The equilibrium level of  $4N\mu$  was reached after approximately 80,000 – 100,000 generations. Boxplots show median, interquartile range, and extreme data points of 50 replicated simulations.
